# Supplementary material for: A systematic review of loss of independence in Parkinson’s disease
Source: Springer Nature journal article supplement (doi:10.1007/s00415-015-7847-8), 2015-07-14
Supplement: 415_2015_7847_MOESM1_ESM.pdf [file 415_2015_7847_MOESM1_ESM.pdf]

## **A systematic review of loss of independence in Parkinson's disease**

Angus D Macleod<sup>1\*</sup>, Grieve JWK<sup>2</sup>, Carl E Counsell<sup>1</sup>

<sup>1</sup>Institute of Applied Health Sciences, University of Aberdeen, Polwarth Building, Foresterhill, Aberdeen, AB25 2ZD, UK

<sup>2</sup>Institute of Neurological Sciences, Southern General Hospital, 1345 Govan Road, Glasgow, G51 4TF, UK

\*Corresponding author: Dr A D Macleod

Address: Room 1:014, Institute of Applied Health Sciences, University of Aberdeen, Polwarth Building, Foresterhill, Aberdeen, AB25 2ZD, UK

Telephone: +44 (0)1224 437120

Fax: +44 (0)1224 551188

E-mail address: Angus.Macleod@abdn.ac.uk

## Supplementary appendix: Search strategy

### *Medline*

1. exp parkinsonian disorders/
2. parkinson:.tw.
3. 1 or 2
4. Disability Evaluation/
5. (disability or disabled).tw.
6. Disabled Persons/
7. "Activities of Daily Living"/
8. Activities of daily living.tw.
9. ADL.tw.
10. (dependent or dependenc?).tw.
11. (Schwab and England).tw.
12. barthel.tw.
13. (Unified park: disease rating scale adj3 II).tw.
14. (UPDRS II or UPDRSII or UPDRS 2 or UPDRS2).tw.
15. ((hoehn and yahr) or H&Y).tw.
16. Webster.tw.
17. Rankin.tw.
18. "Severity of Illness Index"/
19. or/4-18
20. 3 and 19
21. exp animals/ not humans.sh.
22. 20 not 21

### *Embase*

1. exp parkinson disease/
2. extrapyramidal syndrome/
3. exp parkinsonism/
4. parkinson:.tw.
5. or/1-4
6. disability/ or adl disability/ or invalidity/ or physical disability/ or social disability/ or disability severity/
7. (disability or disabled).tw.
8. daily life activity/
9. activities of daily living.tw.
10. ADL.tw.
11. (dependent or dependenc?).tw.
12. (Schwab and England).tw.
13. Barthel index/
14. Barthel.tw.
15. (Unified park: disease rating scale adj3 II).tw.
16. (UPDRS II or UPDRSII or UPDRS 2 or UPDRS2).tw.
17. ((Hoehn and Yahr) or H&Y).tw.
18. Webster.tw.
19. Rankin scale/ or Rankin.tw.
20. or/6-19
21. 5 and 20
22. exp animal/ not human/
23. 21 not 22
