# Supplementary material for: A systematic review of loss of independence in Parkinson’s disease
Source: Springer Nature journal article supplement (doi:10.1007/s00415-015-7847-8), 2015-07-14
Supplement: 415_2015_7847_MOESM2_ESM.pdf [file 415_2015_7847_MOESM2_ESM.pdf]

## **A systematic review of loss of independence in Parkinson's disease**

Angus D Macleod<sup>1\*</sup>, Grieve JWK<sup>2</sup>, Carl E Counsell<sup>1</sup>

<sup>1</sup>Institute of Applied Health Sciences, University of Aberdeen, Polwarth Building, Foresterhill, Aberdeen, AB25 2ZD, UK

<sup>2</sup>Institute of Neurological Sciences, Southern General Hospital, 1345 Govan Road, Glasgow, G51 4TF, UK

\*Corresponding author: Dr Angus D Macleod

Address: Room 1:014, Institute of Applied Health Sciences, University of Aberdeen, Polwarth Building, Foresterhill, Aberdeen, AB25 2ZD, UK

Telephone: +44 (0)1224 437120

Fax: +44 (0)1224 551188

E-mail address: Angus.Macleod@abdn.ac.uk

**Supplementary table:** Dependency and death over time.

| Results of included studies                                 | Year of follow-up |           |          |          |         |          |         |          |          |         |         |          |
|-------------------------------------------------------------|-------------------|-----------|----------|----------|---------|----------|---------|----------|----------|---------|---------|----------|
|                                                             | Baseline          | 2         | 3        | 4        | 5       | 6        | 8       | 10       | 12       | 15      | 17      | 20       |
| <i>Inception cohorts</i>                                    |                   |           |          |          |         |          |         |          |          |         |         |          |
| Hoehn 1967[1]                                               | N indep (%)       |           | 79 (72)  |          |         |          | 16 (39) |          | 8 (17)   |         | 2 (11)  |          |
| Def: H&Y ≥ 4                                                | N dep (%)         |           | 16 (15)  |          |         |          | 13 (32) |          | 12 (25)  |         | 4 (21)  |          |
| BL: Recruitment [<2 y from onset]                           | N dead (%)        |           | 15 (14)  |          |         |          | 12 (30) |          | 28 (58)  |         | 13 (68) |          |
| Hoehn 1985[2]                                               | N indep (%)       |           | 20 (91)  |          |         |          | 47 (78) |          | 40 (49)  |         |         |          |
| Def: H&Y ≥ 4                                                | N dep (%)         |           | 2 (9)    |          |         |          | 7 (12)  |          | 17 (21)  |         |         |          |
| BL: Recruitment [<2 y from onset]                           | N dead (%)        |           | 0 (0)    |          |         |          | 6 (10)  |          | 24 (30)  |         |         |          |
| Hely 2008[3]                                                | N indep (%)       | 136 (100) | 108 (92) |          | 83 (78) | 66 (60)  | 49 (45) | 34 (29)  |          | 4 (3)   |         | 3 (2)    |
| Def: based on interview                                     | N dep (%)         | 0 (0)     | 7 (6)    |          | 13 (12) | 22 (20)  | 21 (19) | 33 (28)  |          | 48 (37) |         | 27 (21)  |
| BL: Recruitment [early disease]                             | N dead (%)        | 0 (0)     | 3 (3)    |          | 11 (10) | 22 (20)  | 38 (35) | 50 (43)  |          | 77 (60) |         | 100 (77) |
| Auyeung 2012[4]                                             | N indep (%)       |           |          |          |         |          |         |          | 54 (32)  |         |         |          |
| Def: S&E <80%                                               | N dep (%)         |           |          |          |         |          |         |          | 117 (68) |         |         |          |
| BL: Recruitment                                             | N dead (%)        |           |          |          |         |          |         |          | NS       |         |         |          |
| Auyeung 2012[4]                                             | N indep (%)       | 171       |          |          |         |          |         |          | 110 (64) |         |         |          |
| Def: H&Y ≥ 4                                                | N dep (%)         | 0         |          |          |         |          |         |          | 61 (36)  |         |         |          |
| BL: Recruitment                                             | N dead (%)        | 0         |          |          |         |          |         |          | NA       |         |         |          |
| Velseboer 2013[5]                                           | N indep (%)       | 129 (100) | 113 (93) | 107 (86) |         | 80 (67)  |         |          |          |         |         |          |
| Def: H&Y ≥ 4                                                | N dep (%)         | 0 (0)     | 3 (2)    | 11 (9)   |         | 14 (12)  |         |          |          |         |         |          |
| BL: Diagnosis                                               | N dead (%)        | 0 (0)     | 6 (5)    | 6 (5)    |         | 25 (21)  |         |          |          |         |         |          |
| <i>Non-inception cohort</i>                                 |                   |           |          |          |         |          |         |          |          |         |         |          |
| Yahr 1976[6]                                                | N dead or dep (%) |           |          |          |         |          | NS (48) |          | NS (60)  |         | NS (63) |          |
| Def: H&Y ≥ 4; BL: Onset <sup>a</sup>                        |                   |           |          |          |         |          |         |          |          |         |         |          |
| Aimard 1984[7]                                              | N indep (%)       |           | 142 (83) |          |         | 61 (77)  |         | 21 (72)  |          | 18 (78) |         |          |
| Def: H&Y ≥ 4                                                | N dep (%)         |           | 29 (17)  |          |         | 18 (23)  |         | 8 (28)   |          | 5 (22)  |         |          |
| BL: Unclear                                                 | N dead (%)        |           | NS       |          |         | NS       |         | NS       |          | NS      |         |          |
| Guillard 1986[8] – group 1 [diagnosis pre-1971]             | N indep (%)       |           |          |          |         | NS       |         |          | NS       |         |         |          |
| Def: “loss of autonomy”                                     | N dep (%)         |           |          |          |         | NS (54)  |         |          | NS (80)  |         |         |          |
| BL: Start of LD treatment                                   | N dead (%)        |           |          |          |         | NS       |         |          | NS       |         |         |          |
| Guillard 1986[8] – group 2 [diagnosis 1971 onwards]         | N indep (%)       |           |          |          |         | NS       |         |          | NS       |         |         |          |
| Def: “loss of autonomy”                                     | N dep (%)         |           |          |          |         | NS (33)  |         |          | NS (61)  |         |         |          |
| BL: Start of LD treatment                                   | N dead (%)        |           |          |          |         | NS       |         |          | NS       |         |         |          |
| Chia 1992[9]                                                | N indep (%)       | 204 (95)  |          |          |         | 109 (51) |         |          |          |         |         |          |
| Def: H&Y ≥ 4                                                | N dep (%)         | 11 (5)    |          |          |         | 60 (28)  |         |          |          |         |         |          |
| BL: Onset                                                   | N dead (%)        | 0 (0)     |          |          |         | 46 (21)  |         |          |          |         |         |          |
| Uitti 1993[10]                                              | N indep (%)       |           |          |          |         |          |         | 63 (36)  |          |         |         |          |
| Def: H&Y ≥ 4                                                | N dep (%)         |           |          |          |         |          |         | 111 (64) |          |         |         |          |
| BL: Recruitment                                             | N dead (%)        |           |          |          |         |          |         | NS       |          |         |         |          |
| Scigliano 1996[11]                                          | N indep (%)       |           |          |          | 68 (44) |          |         |          |          |         |         |          |
| Def: Not “able to perform most normal self-care activities” | N dep (%)         |           |          |          | 87 (56) |          |         |          |          |         |         |          |
| BL: Recruitment                                             | N dead (%)        |           |          |          | NS      |          |         |          |          |         |         |          |
| Sato 2006[12]                                               | N indep (%)       |           |          |          |         | NS       |         |          | NS       |         | NS      |          |
| Def: H&Y ≥ 4                                                | N dep (%)         |           |          |          |         | NS (7)   |         |          | NS (28)  |         | NS (41) |          |
| BL: Onset                                                   | N dead (%)        |           |          |          |         | NS       |         |          | NS       |         | NS      |          |
| Jasinska-Myga 2012[13]                                      | N indep (%)       | 491       | 352      |          | 244     |          | 143     | 78       | 31       |         |         |          |
| Def: Based on interview                                     | N dep (%)         | 0         | NS (7)   |          | NS (16) |          | NS (27) | NS (39)  | NS (56)  |         |         |          |
| BL: Recruitment                                             | N dead (%)        | 0         | NS       |          | NS      |          | NS      | NS       | NS       |         |         |          |

<sup>a</sup>Each time period 5 years after treatment start of treatment; patients who died before being treated with levodopa not included. Abbreviations: BL: baseline for FU time measurement; Def = definition of dependence; dep = dependence; H&Y = Hoehn & Yahr stage; indep = independence; LD = levodopa; N = number; NS = not stated; y = years.

## References

- [1] Hoehn MM, Yahr MD. Parkinsonism: onset, progression, and mortality. *Neurology*. 1967;17:427-42.
- [2] Hoehn MM. Result of chronic levodopa therapy and its modification by bromocriptine in Parkinson's disease. *Acta Neurol Scand*. 1985;71:97-106.
- [3] Hely MA, Reid WG, Adena MA, Halliday GM, Morris JG. The Sydney multicenter study of Parkinson's disease: the inevitability of dementia at 20 years. *Mov Disord*. 2008;23:837-44.
- [4] Auyeung M, Tsoi TH, Mok V, Cheung CM, Lee CN, Li R, et al. Ten year survival and outcomes in a prospective cohort of new onset Chinese Parkinson's disease patients. *J Neurol Neurosurg Psychiatry*. 2012;83:607-11.
- [5] Velseboer DC, Broeders M, Post B, van Geloven N, Speelman JD, Schmand B, et al. Prognostic factors of motor impairment, disability, and quality of life in newly diagnosed PD. *Neurology*. 2013;80:627-33.
- [6] Yahr MD. Evaluation of long-term therapy in Parkinson's disease: mortality and therapeutic efficacy. In: Birkmayer W, Hornykiewicz O, eds. *Advances in Parkinsonism*. Basle: Editiones Roche; 1976:435-43.
- [7] Aimard G, Henry E, Devic M. Parkinson's disease. Retrospective study of 302 clinical case records. *Presse Med*. 1984;13:919-22.
- [8] Guillard A, Chastang C, Fenelon G. Long-term study of 416 cases of Parkinson disease. Prognostic factors and therapeutic implications. *Rev Neurol (Paris)*. 1986;142:207-14.
- [9] Chia LG, Liu LH. Parkinson's disease in Taiwan: an analysis of 215 patients. *Neuroepidemiology*. 1992;11:113-20.
- [10] Uitti RJ, Ahlskog JE, Maraganore DM, Muenter MD, Atkinson EJ, Cha RH, et al. Levodopa Therapy and Survival in Idiopathic Parkinsons-Disease - Olmsted County Project. *Neurology*. 1993;43:1918-26.
- [11] Scigliano G, Musicco M, Soliveri P, Girotti F, Giovannini P, Fetoni V, et al. Progression and prognosis in Parkinson's disease in relation to concomitant cerebral or peripheral vasculopathy. *Adv Neurol*. 1996;69:305-9.
- [12] Sato K, Hatano T, Yamashiro K, Kagohashi M, Nishioka K, Izawa N, et al. Prognosis of Parkinson's disease: time to stage III, IV, V, and to motor fluctuations. *Mov Disord*. 2006;21:1384-95.
- [13] Jasinska-Myga B, Heckman MG, Wider C, Putzke JD, Wszolek ZK, Uitti RJ. Loss of ability to work and ability to live independently in Parkinson's disease. *Parkinsonism Relat Disord*. 2012;18(2):130-5.
